# Supplementary material for: Analysis of Association between the Consumer Food Quality Perception and Acceptance of Enhanced Meat Products and Novel Packaging in a Population-Based Sample of Polish Consumers
Source: PubMed Central journal article supplement (PMC7690865; doi:10.3390/foods9111526), 2020-10-23
Supplement: foods-09-01526-s001.pdf [file foods-09-01526-s001.pdf]

# Analysis of Association Between the Consumer Food Quality Perception and Acceptance of Enhanced Meat Products and Novel Packaging in a Population-Based Sample of Polish Consumers

Dominika Guzek <sup>1,\*</sup>, Dominika Głąbska <sup>2</sup>, Marta Sajdakowska <sup>1</sup> and Krystyna Gutkowska <sup>1</sup>

**Supplementary Table 1.** Acceptance of the animal-derived food products enhancing as the quality improvement method, for low income respondents who declared diverse quality determinants (n=261).

| Declared quality determinants           | Acceptance of the animal-derived food products enhancing as the quality improvement method |            |            |           | <i>p</i> |
|-----------------------------------------|--------------------------------------------------------------------------------------------|------------|------------|-----------|----------|
|                                         | Disapprove                                                                                 | Neutral    | Approve    | NA        |          |
| Origin                                  | 2 (18.2%)                                                                                  | 2 (18.2%)  | 5 (45.5%)  | 2 (18.2%) |          |
| Production technology                   | 6 (40.0%)                                                                                  | 5 (33.3%)  | 3 (20.0%)  | 1 (6.7%)  |          |
| Manufacturer                            | 27 (49.1%)                                                                                 | 0 (0.0%)   | 21 (38.2%) | 7 (12.7%) |          |
| Components and nutritional value        | 5 (14.3%)                                                                                  | 12 (34.3%) | 14 (40.0%) | 4 (11.4%) |          |
| Visual and sensory characteristics      | 3 (11.1%)                                                                                  | 18 (66.7%) | 3 (11.1%)  | 3 (11.1%) | <0.0001  |
| Expiry date                             | 15 (28.8%)                                                                                 | 17 (32.7%) | 16 (30.8%) | 4 (7.7%)  |          |
| Cost                                    | 5 (17.9%)                                                                                  | 9 (32.1%)  | 10 (35.7%) | 4 (14.3%) |          |
| Not able to define quality determinants | 9 (23.7%)                                                                                  | 8 (21.1%)  | 14 (36.8%) | 7 (18.4%) |          |

\*NA: do not observe such method for food products of animal origin in Poland.

**Supplementary Table 2.** Acceptance of the animal-derived food products enhancing as the quality improvement method, for high income respondents who declared diverse quality determinants (n=324).

| Declared quality determinants           | Acceptance of the animal-derived food products enhancing as the quality improvement method |            |            |           | <i>p</i> |
|-----------------------------------------|--------------------------------------------------------------------------------------------|------------|------------|-----------|----------|
|                                         | Disapprove                                                                                 | Neutral    | Approve    | NA        |          |
| Origin                                  | 8 (47.1%)                                                                                  | 4 (23.5%)  | 4 (23.5%)  | 1 (5.9%)  |          |
| Production technology                   | 14 (33.3%)                                                                                 | 11 (26.2%) | 15 (35.7%) | 2 (4.8%)  |          |
| Manufacturer                            | 8 (28.6%)                                                                                  | 8 (28.6%)  | 3 (10.7%)  | 9 (32.1%) |          |
| Components and nutritional value        | 29 (31.9%)                                                                                 | 23 (25.3%) | 35 (38.5%) | 4 (4.4%)  |          |
| Visual and sensory characteristics      | 17 (31.5%)                                                                                 | 12 (22.2%) | 18 (33.3%) | 7 (13.0%) | 0.0031   |
| Expiry date                             | 27 (45.8%)                                                                                 | 10 (16.9%) | 22 (37.3%) | 0 (0.0%)  |          |
| Cost                                    | 4 (25.0%)                                                                                  | 2 (12.5%)  | 8 (50.0%)  | 2 (12.5%) |          |
| Not able to define quality determinants | 5 (29.4%)                                                                                  | 4 (23.5%)  | 7 (41.2%)  | 1 (5.9%)  |          |

\*NA: do not observe such method for food products of animal origin in Poland.

**Supplementary Table 3.** Acceptance of the animal-derived food products enhancing as the quality improvement method, for respondents of primary and vocational education level who declared diverse quality determinants (n=462).

| Declared quality determinants           | Acceptance of the animal-derived food products enhancing as the quality improvement method |            |            |            | <i>p</i> |
|-----------------------------------------|--------------------------------------------------------------------------------------------|------------|------------|------------|----------|
|                                         | Disapprove                                                                                 | Neutral    | Approve    | NA         |          |
| Origin                                  | 6 (31.6%)                                                                                  | 5 (26.3%)  | 6 (31.6%)  | 2 (10.5%)  | 0.2013   |
| Production technology                   | 20 (30.8%)                                                                                 | 13 (20.0%) | 22 (33.8%) | 10 (15.4%) |          |
| Manufacturer                            | 8 (42.1%)                                                                                  | 2 (10.5%)  | 4 (21.1%)  | 5 (26.3%)  |          |
| Components and nutritional value        | 28 (29.5%)                                                                                 | 25 (26.3%) | 38 (40.0%) | 4 (4.2%)   |          |
| Visual and sensory characteristics      | 15 (28.3%)                                                                                 | 13 (24.5%) | 19 (35.8%) | 6 (11.3%)  |          |
| Expiry date                             | 51 (37.2%)                                                                                 | 28 (20.4%) | 39 (28.5%) | 19 (13.9%) |          |
| Cost                                    | 4 (15.4%)                                                                                  | 7 (26.9%)  | 11 (42.3%) | 4 (15.4%)  |          |
| Not able to define quality determinants | 8 (16.7%)                                                                                  | 13 (27.1%) | 22 (45.8%) | 5 (10.4%)  |          |

\*NA: do not observe such method for food products of animal origin in Poland.

**Supplementary Table 4.** Acceptance of the animal-derived food products enhancing as the quality improvement method, for respondents of secondary and higher education level respondents who declared diverse quality determinants (n=529).

| Declared quality determinants           | Acceptance of the animal-derived food products enhancing as the quality improvement method |            |            |            | <i>p</i> |
|-----------------------------------------|--------------------------------------------------------------------------------------------|------------|------------|------------|----------|
|                                         | Disapprove                                                                                 | Neutral    | Approve    | NA         |          |
| Origin                                  | 16 (36.4%)                                                                                 | 11 (25.0%) | 11 (25.0%) | 6 (13.6%)  | 0.1568   |
| Production technology                   | 35 (43.2%)                                                                                 | 12 (14.8%) | 27 (33.3%) | 7 (8.6%)   |          |
| Manufacturer                            | 9 (33.3%)                                                                                  | 9 (33.3%)  | 8 (29.6%)  | 1 (3.7%)   |          |
| Components and nutritional value        | 42 (33.9%)                                                                                 | 37 (29.8%) | 40 (32.3%) | 5 (4.0%)   |          |
| Visual and sensory characteristics      | 24 (34.3%)                                                                                 | 15 (21.4%) | 21 (30.0%) | 10 (14.3%) |          |
| Expiry date                             | 50 (46.3%)                                                                                 | 16 (14.8%) | 34 (31.5%) | 8 (7.4%)   |          |
| Cost                                    | 10 (29.4%)                                                                                 | 10 (29.4%) | 11 (32.4%) | 3 (8.8%)   |          |
| Not able to define quality determinants | 10 (24.4%)                                                                                 | 9 (22.0%)  | 16 (39.0%) | 6 (14.6%)  |          |

\*NA: do not observe such method for food products of animal origin in Poland.

**Supplementary Table 5.** Acceptance of the animal-derived food products enhancing as the quality improvement method, for respondents living in cities and villages of less than 100,000 inhabitants who declared diverse quality determinants (n=688).

| Declared quality determinants           | Acceptance of the animal-derived food products enhancing as the quality improvement method |            |            |           | <i>p</i> |
|-----------------------------------------|--------------------------------------------------------------------------------------------|------------|------------|-----------|----------|
|                                         | Disapprove                                                                                 | Neutral    | Approve    | NA        |          |
| Origin                                  | 7 (35.0%)                                                                                  | 5 (25.0%)  | 3 (15.0%)  | 5 (25.0%) | 0.3104   |
| Production technology                   | 15 (38.5%)                                                                                 | 7 (17.9%)  | 12 (30.8%) | 5 (12.8%) |          |
| Manufacturer                            | 8 (28.6%)                                                                                  | 7 (25%)    | 10 (35.7%) | 3 (10.7%) |          |
| Components and nutritional value        | 22 (29.7%)                                                                                 | 19 (25.7%) | 29 (39.2%) | 4 (5.4%)  |          |
| Visual and sensory characteristics      | 10 (28.6%)                                                                                 | 8 (22.9%)  | 13 (37.1%) | 4 (11.4%) |          |
| Expiry date                             | 25 (38.5%)                                                                                 | 10 (15.4%) | 21 (32.3%) | 9 (13.8%) |          |
| Cost                                    | 4 (14.3%)                                                                                  | 11 (39.3%) | 10 (35.7%) | 3 (10.7%) |          |
| Not able to define quality determinants | 3 (12.0%)                                                                                  | 7 (28.0%)  | 12 (48.0%) | 3 (12.0%) |          |

\*NA: do not observe such method for food products of animal origin in Poland.

**Supplementary Table 6.** Acceptance of the animal-derived food products enhancing as the of the quality improvement method, for respondents living in cities of more than 100,000 inhabitants who declared diverse quality determinants (n=314).

| Declared quality determinants           | Acceptance of the animal-derived food products enhancing as the of the quality improvement method |            |            |            | <i>p</i> |
|-----------------------------------------|---------------------------------------------------------------------------------------------------|------------|------------|------------|----------|
|                                         | Disapprove                                                                                        | Neutral    | Approve    | NA         |          |
| Origin                                  | 15 (34.1%)                                                                                        | 11 (25.0%) | 14 (31.8%) | 4 (9.1%)   | 0.2359   |
| Production technology                   | 40 (37.4%)                                                                                        | 18 (16.8%) | 37 (34.6%) | 12 (11.2%) |          |
| Manufacturer                            | 9 (50.0%)                                                                                         | 4 (22.2%)  | 2 (11.1%)  | 3 (16.7%)  |          |
| Components and nutritional value        | 29 (32.2%)                                                                                        | 20 (22.2%) | 28 (31.1%) | 13 (14.4%) |          |
| Visual and sensory characteristics      | 50 (34.0%)                                                                                        | 41 (27.9%) | 49 (33.3%) | 7 (4.8%)   |          |
| Expiry date                             | 77 (42.5%)                                                                                        | 34 (18.8%) | 52 (28.7%) | 18 (9.9%)  |          |
| Cost                                    | 11 (29.7%)                                                                                        | 9 (24.3%)  | 13 (35.1%) | 4 (10.8%)  |          |
| Not able to define quality determinants | 14 (21.9%)                                                                                        | 15 (23.4%) | 27 (42.2%) | 8 (12.5%)  |          |

\*NA: do not observe such method for food products of animal origin in Poland.

**Supplementary Table 7.** Acceptance of the novel packaging applying for animal-derived food products as the quality improvement method, for low income respondents who declared diverse quality determinants (n=261).

| Declared quality determinants           | Acceptance of the novel packaging applying for animal-derived food products as the quality improvement method |            |            |           | <i>p</i> |
|-----------------------------------------|---------------------------------------------------------------------------------------------------------------|------------|------------|-----------|----------|
|                                         | Disapprove                                                                                                    | Neutral    | Approve    | NA        |          |
| Origin                                  | 1 (6.7%)                                                                                                      | 4 (26.7%)  | 10 (66.7%) | 0 (0.0%)  | 0.1037   |
| Production technology                   | 6 (15.8%)                                                                                                     | 4 (10.5%)  | 27 (71.1%) | 1 (2.6%)  |          |
| Manufacturer                            | 1 (11.1%)                                                                                                     | 2 (22.2%)  | 6 (66.7%)  | 0 (0.0%)  |          |
| Components and nutritional value        | 9 (17.3%)                                                                                                     | 10 (19.2%) | 33 (63.5%) | 0 (0.0%)  |          |
| Visual and sensory characteristics      | 2 (7.1%)                                                                                                      | 3 (10.7%)  | 23 (82.1%) | 0 (0.0%)  |          |
| Expiry date                             | 12 (16.4%)                                                                                                    | 9 (12.3%)  | 51 (69.9%) | 1 (1.4%)  |          |
| Cost                                    | 1 (9.1%)                                                                                                      | 1 (9.1%)   | 7 (63.6%)  | 2 (18.2%) |          |
| Not able to define quality determinants | 2 (5.7%)                                                                                                      | 6 (17.1%)  | 23 (65.7%) | 4 (11.4%) |          |

\*NA: do not observe such method for food products of animal origin in Poland.

**Supplementary Table 8.** Acceptance of the novel packaging applying for animal-derived food products as the quality improvement method, for high income respondents who declared diverse quality determinants (n=324).

| Declared quality determinants           | Acceptance of the novel packaging applying for animal-derived food products as the of the quality improvement method |            |            |          | <i>p</i> |
|-----------------------------------------|----------------------------------------------------------------------------------------------------------------------|------------|------------|----------|----------|
|                                         | Disapprove                                                                                                           | Neutral    | Approve    | NA       |          |
| Origin                                  | 3 (17.6%)                                                                                                            | 5 (29.4%)  | 8 (47.1%)  | 1 (5.9%) | 0.0794   |
| Production technology                   | 5 (11.9%)                                                                                                            | 3 (7.1%)   | 34 (81.0%) | 0 (0.0%) |          |
| Manufacturer                            | 1 (5.3%)                                                                                                             | 6 (31.6%)  | 12 (63.2%) | 0 (0.0%) |          |
| Components and nutritional value        | 18 (19.8%)                                                                                                           | 9 (9.9%)   | 61 (67.0%) | 3 (3.3%) |          |
| Visual and sensory characteristics      | 3 (5.6%)                                                                                                             | 14 (25.9%) | 36 (66.7%) | 1 (1.9%) |          |
| Expiry date                             | 12 (17.6%)                                                                                                           | 8 (11.8%)  | 47 (69.1%) | 1 (1.5%) |          |
| Cost                                    | 2 (12.5%)                                                                                                            | 2 (12.5%)  | 11 (68.8%) | 1 (6.3%) |          |
| Not able to define quality determinants | 0 (0.0%)                                                                                                             | 4 (23.5%)  | 13 (76.5%) | 0 (0.0%) |          |

\*NA: do not observe such method for food products of animal origin in Poland.

**Supplementary Table 9.** Acceptance of the novel packaging applying for animal-derived food products as the quality improvement method, for respondents of primary and vocational education level declaring diverse quality determinants (n=462).

| Declared quality determinants           | Acceptance of the novel packaging applying for animal-derived food products as the quality improvement method |            |            |           | <i>p</i> |
|-----------------------------------------|---------------------------------------------------------------------------------------------------------------|------------|------------|-----------|----------|
|                                         | Disapprove                                                                                                    | Neutral    | Approve    | NA        |          |
| Origin                                  | 0 (0.0%)                                                                                                      | 5 (26.3%)  | 14 (73.7%) | 0 (0.0%)  | 0.0266   |
| Production technology                   | 10 (15.4%)                                                                                                    | 14 (21.5%) | 39 (60.0%) | 2 (3.1%)  |          |
| Manufacturer                            | 1 (5.3%)                                                                                                      | 2 (10.5%)  | 13 (68.4%) | 3 (15.8%) |          |
| Components and nutritional value        | 17 (17.9%)                                                                                                    | 13 (13.7%) | 64 (67.4%) | 1 (1.1%)  |          |
| Visual and sensory characteristics      | 5 (9.4%)                                                                                                      | 9 (17.0%)  | 39 (73.6%) | 0 (0.0%)  |          |
| Expiry date                             | 18 (13.1%)                                                                                                    | 24 (17.5%) | 90 (65.7%) | 5 (3.6%)  |          |
| Cost                                    | 1 (3.8%)                                                                                                      | 2 (7.7%)   | 19 (73.1%) | 4 (15.4%) |          |
| Not able to define quality determinants | 5 (10.4%)                                                                                                     | 8 (16.7%)  | 33 (68.8%) | 2 (4.2%)  |          |

\*NA: do not observe such method for food products of animal origin in Poland.

**Supplementary Table 10.** Acceptance of the novel packaging applying for animal-derived food products as the quality improvement method, for respondents of secondary and higher education level who declared diverse quality determinants (n=529).

| Declared quality determinants           | Acceptance of the novel packaging applying for animal-derived food products as the quality improvement method |            |            |          | <i>p</i> |
|-----------------------------------------|---------------------------------------------------------------------------------------------------------------|------------|------------|----------|----------|
|                                         | Disapprove                                                                                                    | Neutral    | Approve    | NA       |          |
| Origin                                  | 5 (11.4%)                                                                                                     | 12 (27.3%) | 25 (56.8%) | 2 (4.5%) | 0.0050   |
| Production technology                   | 14 (17.3%)                                                                                                    | 6 (7.4%)   | 60 (74.1%) | 1 (1.2%) |          |
| Manufacturer                            | 1 (3.7%)                                                                                                      | 8 (29.6%)  | 18 (66.7%) | 0 (0.0%) |          |
| Components and nutritional value        | 22 (17.7%)                                                                                                    | 20 (16.1%) | 80 (64.5%) | 2 (1.6%) |          |
| Visual and sensory characteristics      | 5 (7.1%)                                                                                                      | 22 (31.4%) | 41 (58.6%) | 2 (2.9%) |          |
| Expiry date                             | 26 (24.1%)                                                                                                    | 16 (14.8%) | 64 (59.3%) | 2 (1.9%) |          |
| Cost                                    | 4 (11.8%)                                                                                                     | 6 (17.6%)  | 23 (67.6%) | 1 (2.9%) |          |
| Not able to define quality determinants | 2 (4.9%)                                                                                                      | 7 (17.1%)  | 29 (70.7%) | 3 (7.3%) |          |

**Supplementary Table 11.** Acceptance of the novel packaging applying for animal-derived food products as the quality improvement method, for respondents living in cities and villages of less than 100,000 inhabitants who declared diverse quality determinants (n=688).

| Declared quality determinants           | Acceptance of the novel packaging applying for animal-derived food products as the of the quality improvement method |            |             |          | <i>p</i> |
|-----------------------------------------|----------------------------------------------------------------------------------------------------------------------|------------|-------------|----------|----------|
|                                         | Disapprove                                                                                                           | Neutral    | Approve     | NA       |          |
| Origin                                  | 3 (6.8%)                                                                                                             | 11 (25.0%) | 28 (63.6%)  | 2 (4.5%) | 0.1308   |
| Production technology                   | 18 (16.8%)                                                                                                           | 10 (9.3%)  | 76 (71.0%)  | 3 (2.8%) |          |
| Manufacturer                            | 2 (11.1%)                                                                                                            | 4 (22.2%)  | 12 (66.7%)  | 0 (0.0%) |          |
| Components and nutritional value        | 28 (19%)                                                                                                             | 18 (12.2%) | 98 (66.7%)  | 3 (2.0%) |          |
| Visual and sensory characteristics      | 8 (8.9%)                                                                                                             | 21 (23.3%) | 60 (66.7%)  | 1 (1.1%) |          |
| Expiry date                             | 38 (21.0%)                                                                                                           | 30 (16.6%) | 107 (59.1%) | 6 (3.3%) |          |
| Cost                                    | 4 (10.8%)                                                                                                            | 5 (13.5%)  | 26 (70.3%)  | 2 (5.4%) |          |
| Not able to define quality determinants | 7 (10.9%)                                                                                                            | 11 (17.2%) | 42 (65.6%)  | 4 (6.3%) |          |

\*NA: do not observe such method for food products of animal origin in Poland.

**Supplementary Table 12.** Acceptance of the novel packaging applying for animal-derived food products as the of the quality improvement method, for respondents living in cities of more than 100,000 inhabitants who declared diverse quality determinants (n=314).

| Declared quality determinants           | Acceptance of the novel packaging applying for animal-derived food products as the quality improvement method |            |            |           | <i>p</i> |
|-----------------------------------------|---------------------------------------------------------------------------------------------------------------|------------|------------|-----------|----------|
|                                         | Disapprove                                                                                                    | Neutral    | Approve    | NA        |          |
| Origin                                  | 2 (10.0%)                                                                                                     | 7 (35.0%)  | 11 (55.0%) | 0 (0.0%)  | 0.0994   |
| Production technology                   | 6 (15.4%)                                                                                                     | 10 (25.6%) | 23 (59.0%) | 0 (0.0%)  |          |
| Manufacturer                            | 0 (0.0%)                                                                                                      | 6 (21.4%)  | 19 (67.9%) | 3 (10.7%) |          |
| Components and nutritional value        | 12 (16.2%)                                                                                                    | 14 (18.9%) | 47 (63.5%) | 1 (1.4%)  |          |
| Visual and sensory characteristics      | 3 (8.6%)                                                                                                      | 10 (28.6%) | 20 (57.1%) | 2 (5.7%)  |          |
| Expiry date                             | 7 (10.8%)                                                                                                     | 10 (15.4%) | 47 (72.3%) | 1 (1.5%)  |          |
| Cost                                    | 2 (7.1%)                                                                                                      | 4 (14.3%)  | 19 (67.9%) | 3 (10.7%) |          |
| Not able to define quality determinants | 0 (0.0%)                                                                                                      | 4 (16.0%)  | 20 (80.0%) | 1 (4.0%)  |          |

\*NA: do not observe such method for food products of animal origin in Poland.

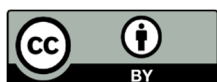

© 2020 by the authors. Submitted for possible open access publication under the terms and conditions of the Creative Commons Attribution (CC BY) license (<http://creativecommons.org/licenses/by/4.0/>).
